# Supplementary material
Source: MDPI journal article supplement (https://www.mdpi.com/2071-1050/13/17/9899)
Supplement: s1 [file s1]

# Analysis of Hydrous Ethanol Price Competitiveness After the Implementation of the Fossil Fuel Import Price Parity Policy in Brazil

Aloisio S. Nascimento Filho<sup>1,4\*</sup>, Hugo Saba<sup>1,2,4</sup>, Rafael G. O. dos Santos<sup>1,4</sup>, João G. A. Calmon<sup>1,4</sup>, Marcio L. V. Araújo<sup>3,4</sup>, Eduardo M. F. Jorge<sup>2,4</sup> and Thiago B. Murari<sup>1,4</sup>

<sup>1</sup>Centro Universitário SENAI CIMATEC, Salvador, 41650-010, Brazil; hugosaba@gmail.com (H.S.); rafapel2312@gmail.com (R.G.O.d.S.); joao.calmon@aln.senaicimatec.edu.br (J.G.A.C.); mura.learning@gmail.com (T.B.M.)

<sup>2</sup>Universidade do Estado da Bahia — UNEB, Salvador, 41741-020, Brazil; emjorge1974@gmail.com

<sup>3</sup>Instituto Federal da Bahia — IFBA, Salvador, 40301-015, Brazil; maraujo.valenca@gmail.com

<sup>4</sup>Núcleo de Pesquisa Aplicada e Inovação — NPAI, Salvador, 41741-020, Brazil

\*Correspondence: [aloisio.nascimento@gmail.com](mailto:aloisio.nascimento@gmail.com)

## Supplementary material

For better understanding the behavior of original data used in the main manuscript set of figures are available in this supplementary material. That shows the dynamics of the hydrous ethanol price, the gasoline price, and the ethanol-gasoline price ratio for the fifteen markets per Brazilian region between 2012 and 2019.

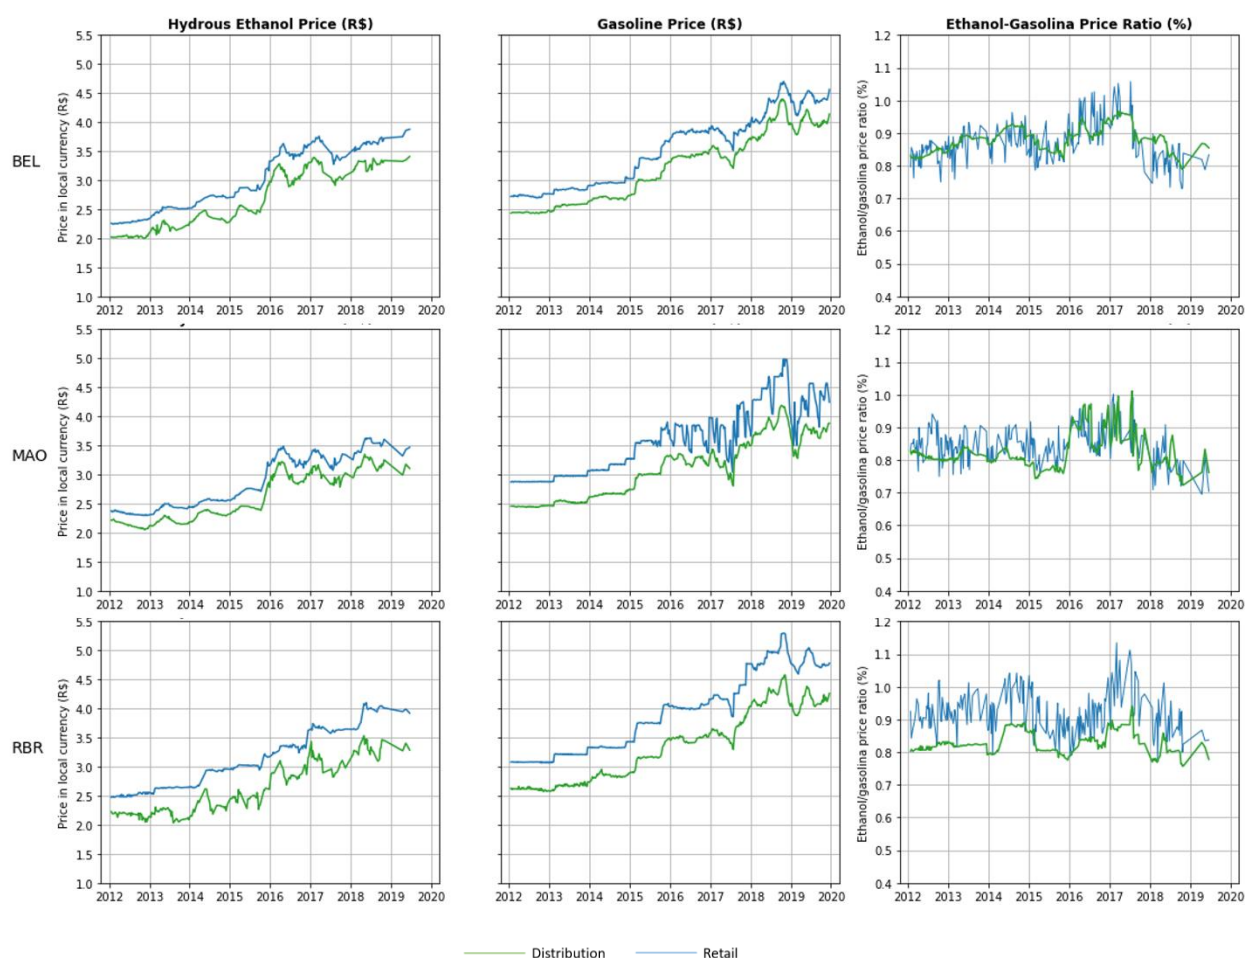

Figure S1. The Distribution and Retail time series of the hydrous ethanol price, gasoline price and ethanol-gasoline price ratio between 2012 and 2019 of cities of the North region of Brazil.

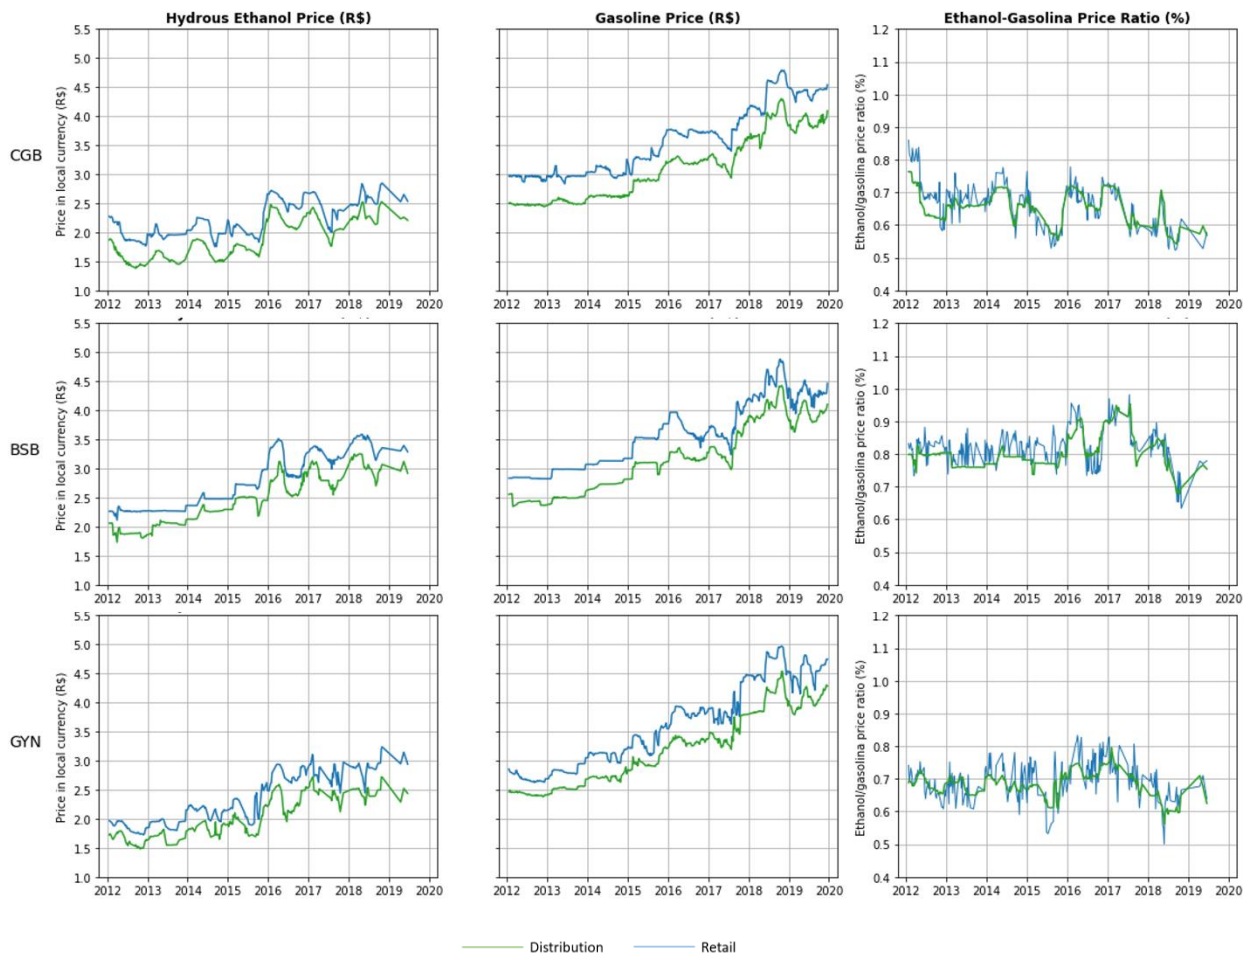

Figure S2. The Distribution and Retail time series of the hydrous ethanol price, gasoline price and ethanol-gasolina price ratio between 2012 and 2019 of cities of the Midwest region of Brazil.

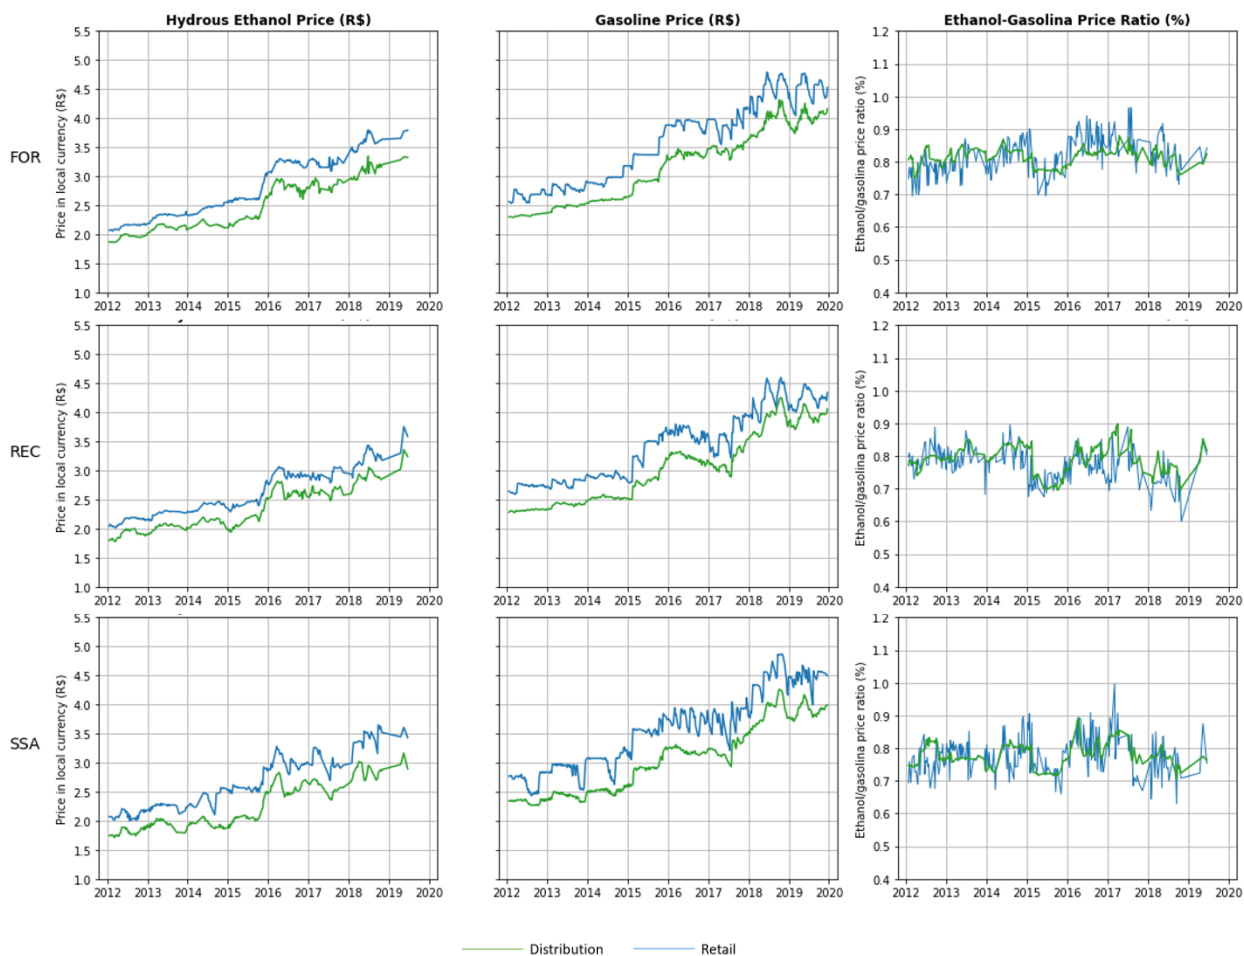

Figure S3. The Distribution and Retail time series of the hydrous ethanol price, gasoline price and ethanol-gasolina price ratio between 2012 and 2019 of cities of the Northeast region of Brazil.

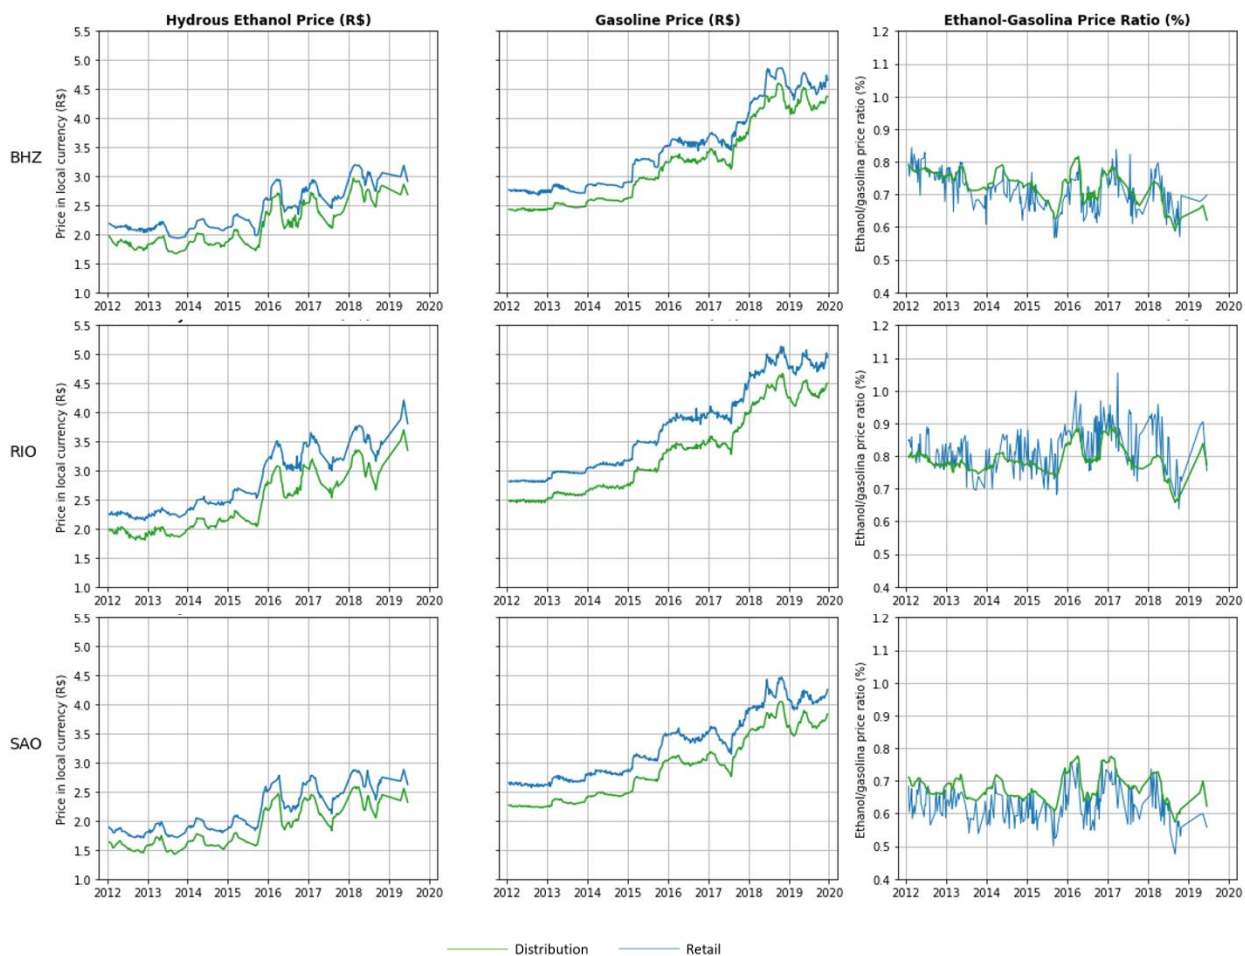

Figure S4. The Distribution and Retail time series of the hydrous ethanol price, gasoline price and ethanol-gasolina price ratio between 2012 and 2019 of cities of the Southeast region of Brazil.

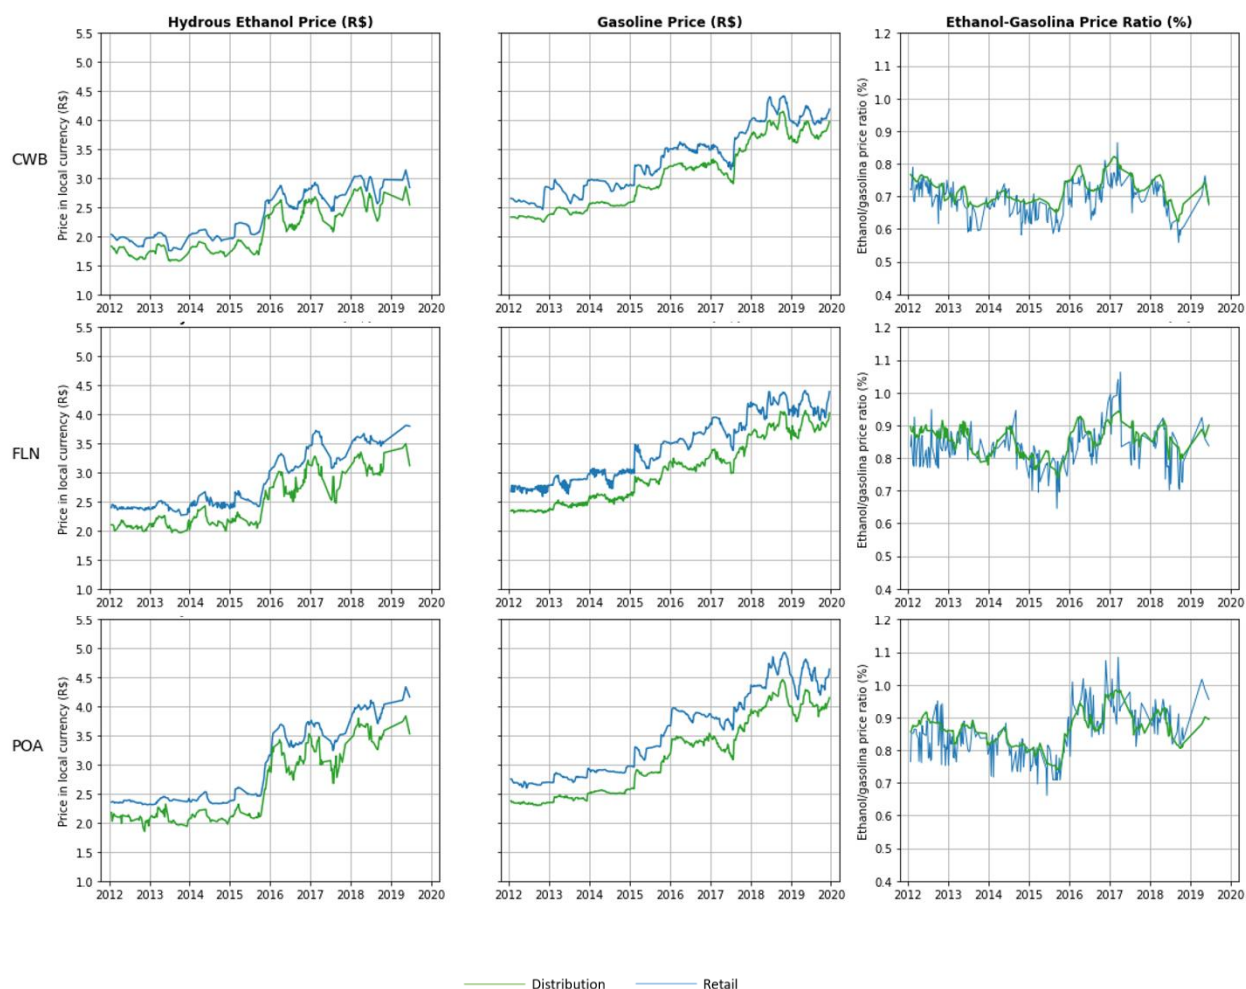

Figure S5. The Distribution and Retail time series of the hydrous ethanol price, gasoline price and ethanol-gasolina price ratio between 2012 and 2019 of cities of the South region of Brazil.
